# Supplementary material for: Electronic properties of pristine and doped graphitic germanium carbide nanomeshes
Source: Royal Society of Chemistry journal article supplement (doi:10.1039/d4cp01336k), 2024-01-01
Supplement: d4cp01336k1.pdf [file d4cp01336k1.pdf]

## Doped systems

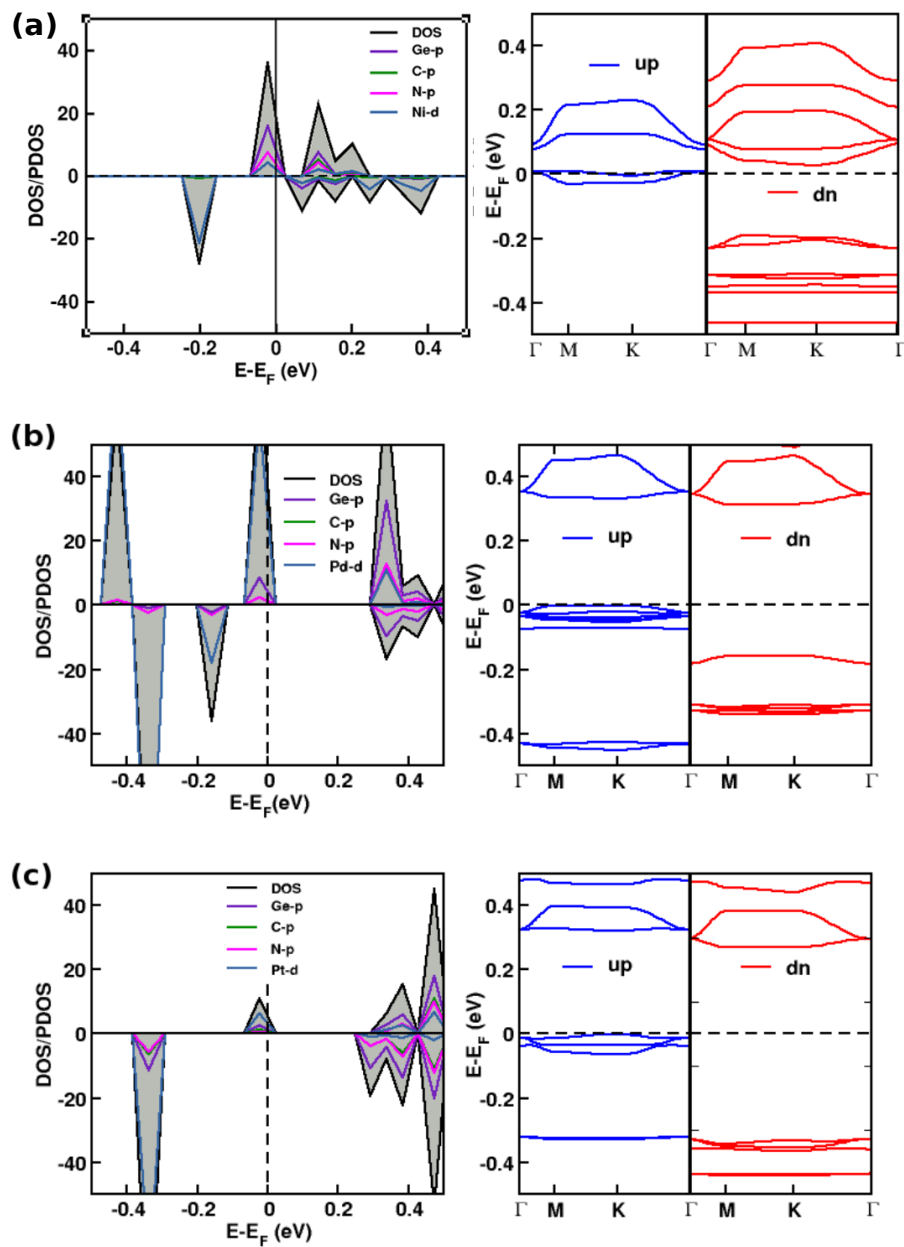

Figure S1: Enlarged views of  $6 \times 6$  N-passivated g-GeC meshes doped with (a) Ni, (b) Pd, and (c) Pt, providing detailed structural insights.

## K-dependence

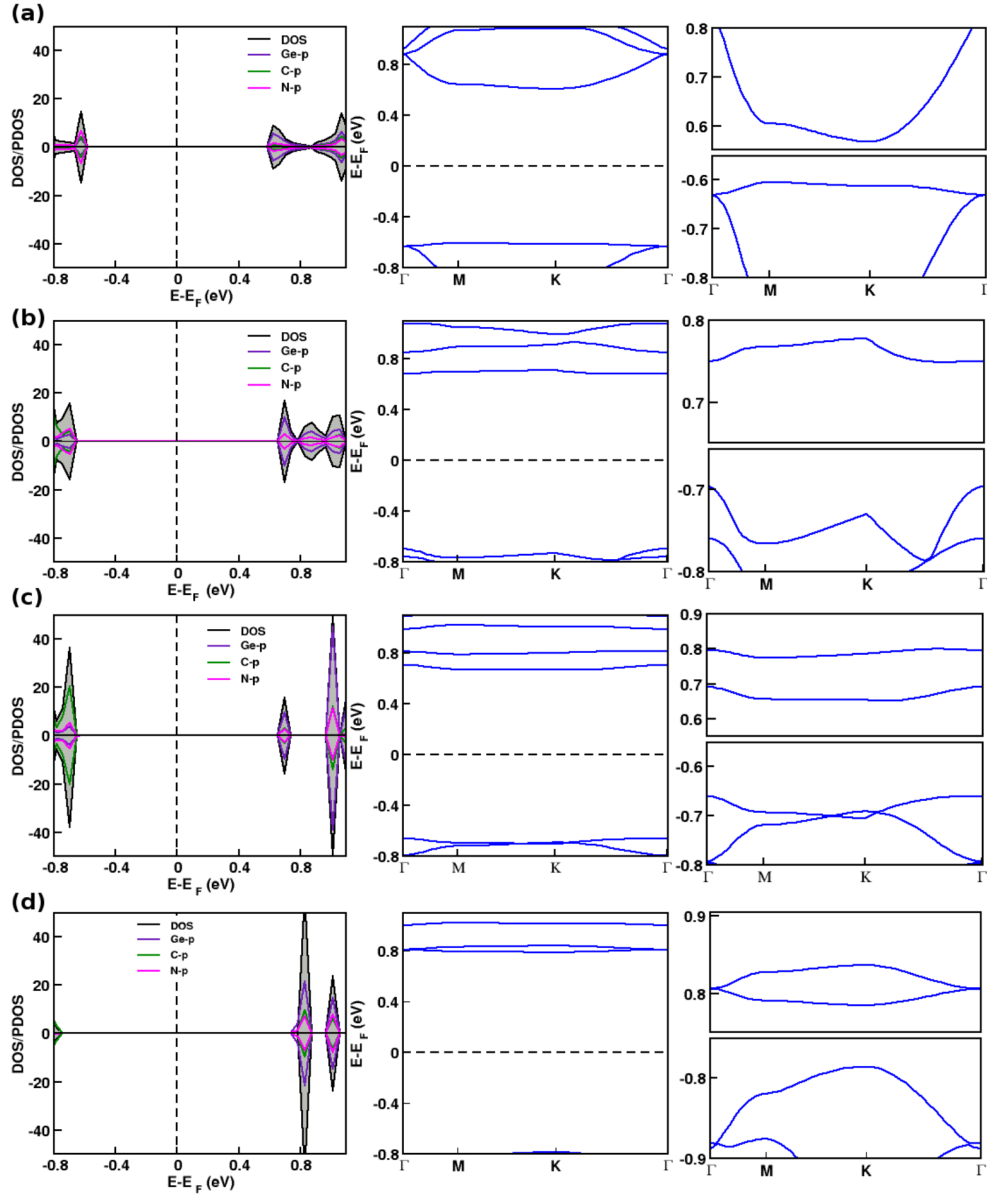

Figure S2: Zoomed-in views of N-passivated g-GeC meshes of varying sizes: (a)  $5 \times 5$ , (b)  $6 \times 6$ , (c)  $7 \times 7$ , and (d)  $8 \times 8$ , demonstrating the K-dependence of the electronic bands.
